# Supplementary material for: Strong Association between Two Polymorphisms on 15q25.1 and Lung Cancer Risk: A Meta-Analysis
Source: PubMed Central journal article supplement (PMC3368941; doi:10.1371/journal.pone.0037970), 2012-06-06

## PRISMA flowchart

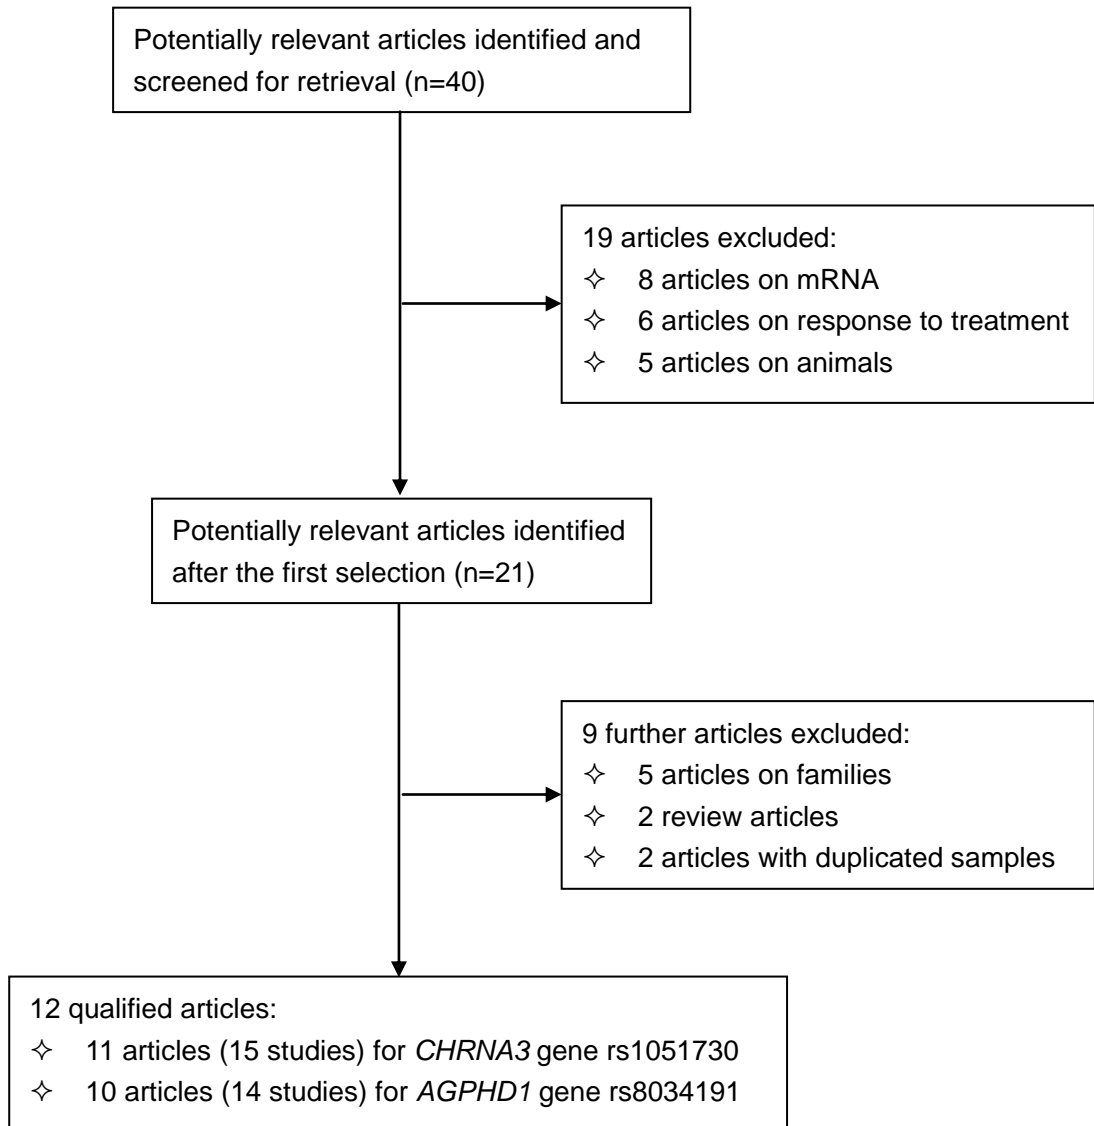

Supplement: pone.0037970.s002.pdf [file pone.0037970.s002.pdf]
